# Supplementary material for: Thermo and pH responsive water soluble polythiophene graft copolymer showing logic operation and nitroaromatic sensing
Source: Royal Society of Chemistry journal article supplement (doi:10.1039/c3ra42479k), 2013-01-01
Supplement: c3ra42479k.pdf [file c3ra42479k.pdf]

**Supplementary Materials of the Manuscript**

**Thermo and pH Responsive Water Soluble Polythiophene Graft  
Copolymer Showing Logic Operation and Nitroaromatic Sensing**

Sandip Das, Dhruva P. Chatterjee<sup>†</sup>, Sanjoy Samanta and Arun K. Nandi\*

Polymer Science Unit, Indian Association for the Cultivation of Science,

Jadavpur, Kolkata700032, India

---

<sup>†</sup> Present address: Dept of Chemistry, Krishnanagar Government College, Nadia-741101

\* For Correspondence: Prof. Arun K. Nandi, E-mail: [psuakn@iacs.res.in](mailto:psuakn@iacs.res.in)

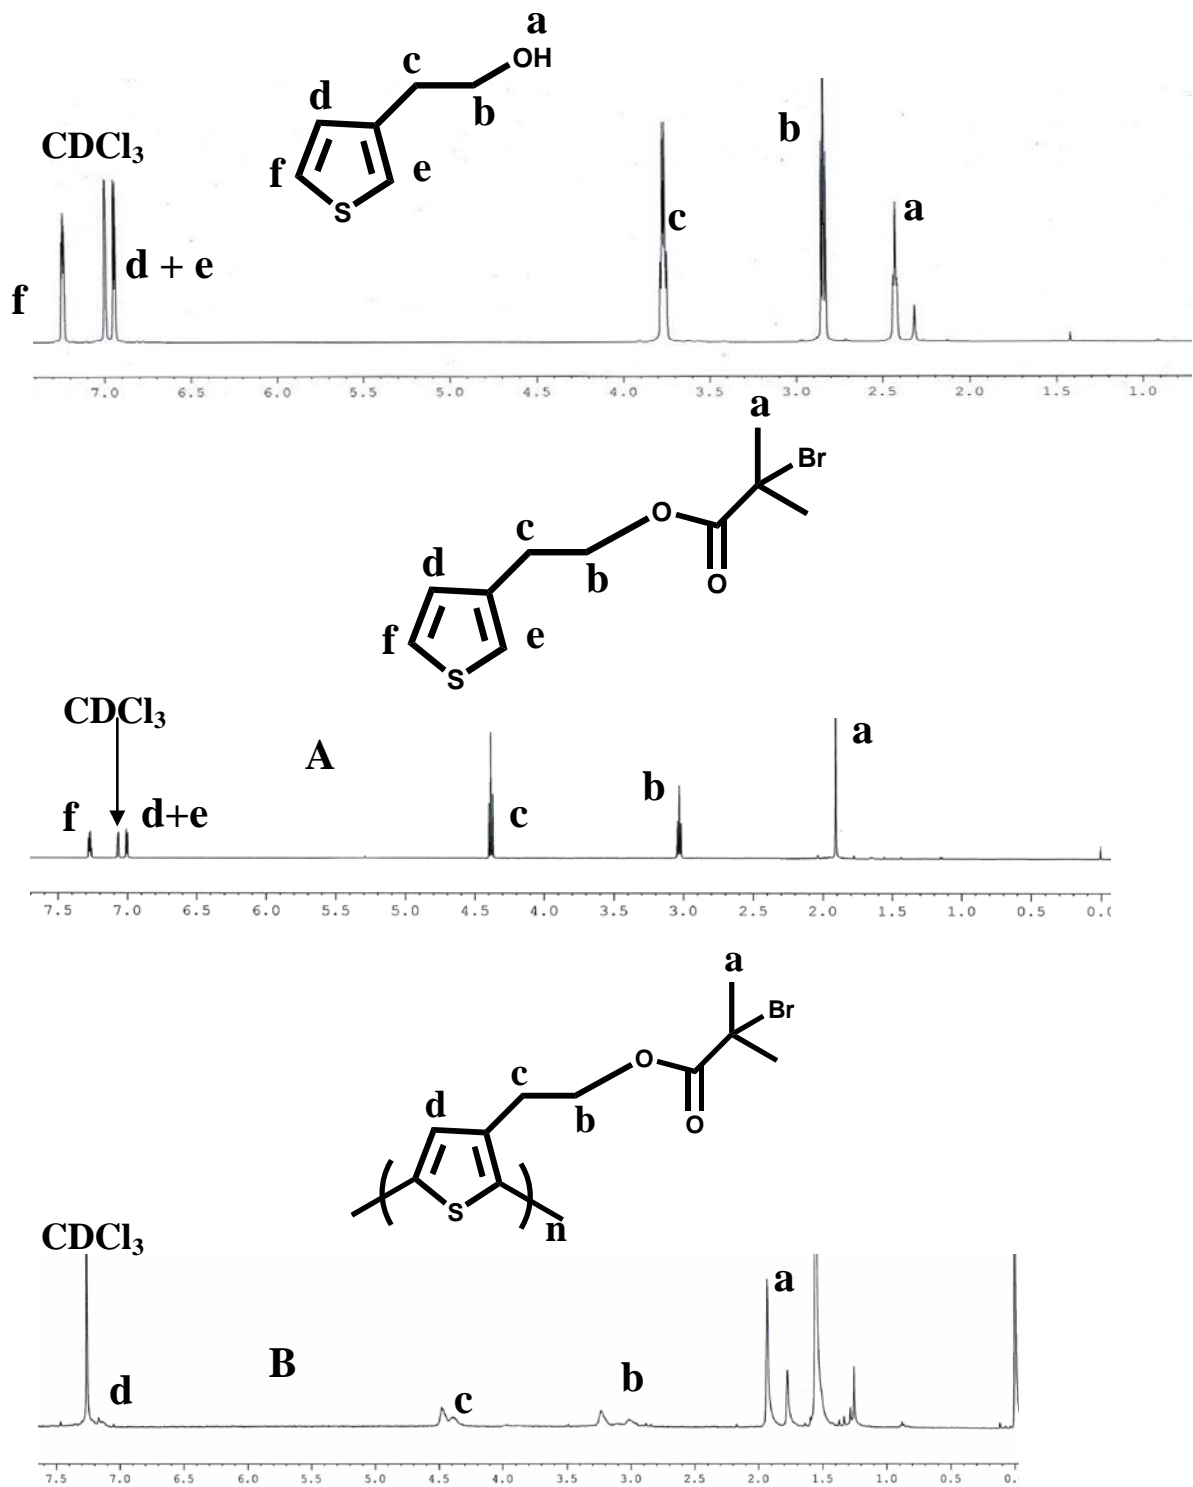

**SI Fig. 1** <sup>1</sup>H NMR spectrum of thiophene-3-ethanol, TI and PTI polymer in CDCl<sub>3</sub>

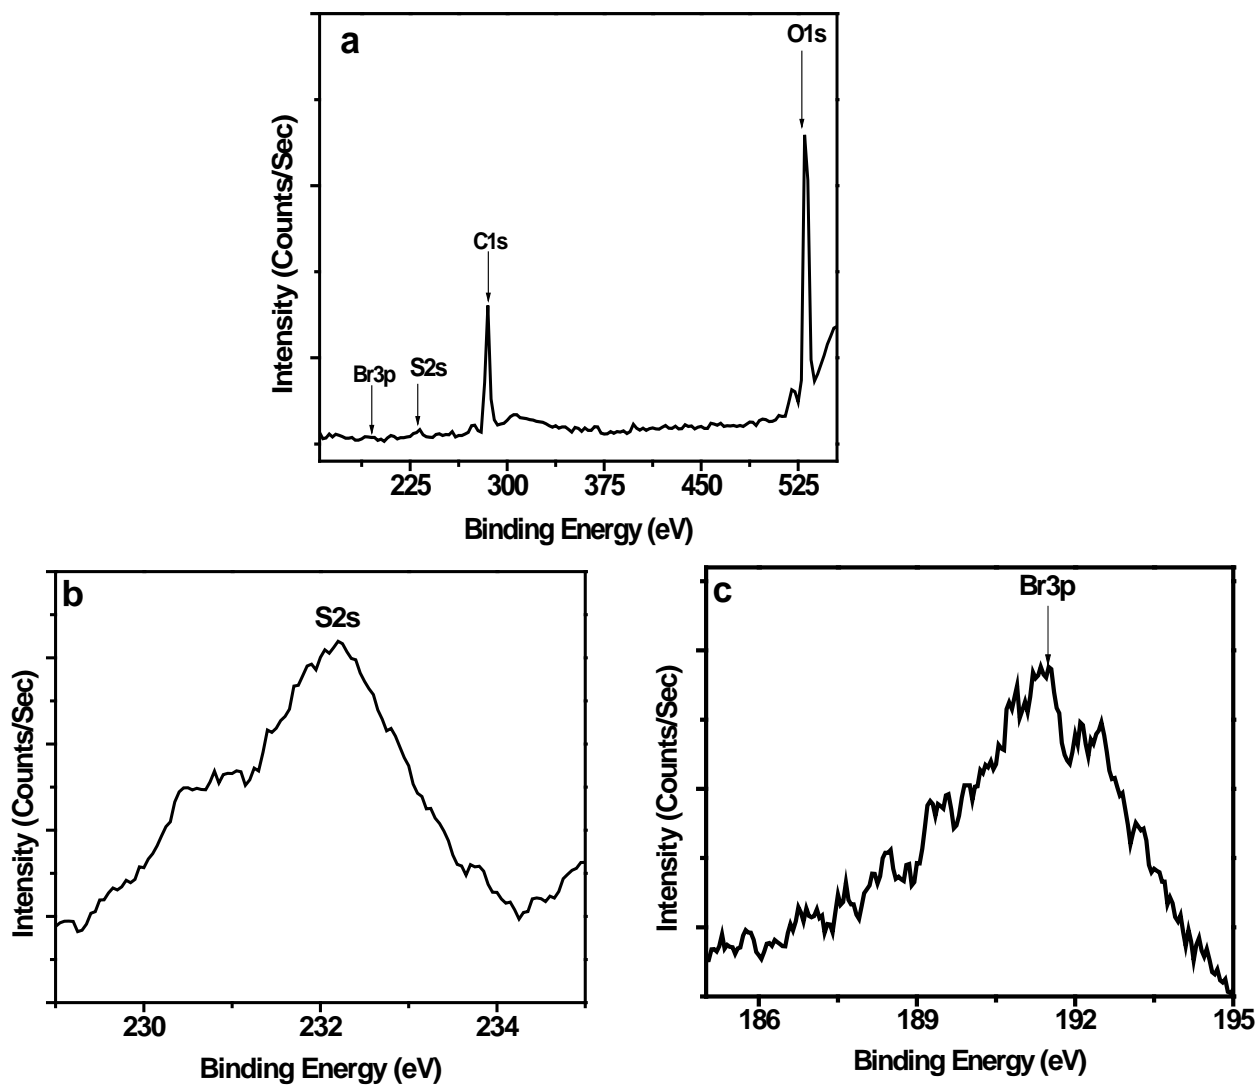

**SI Fig. 2** XPS spectrum of (a) PTI, (b) peak at 232eV corresponds to binding energy of S 2s, (c) peak at 191eV correspond to binding energy of Br 3p.

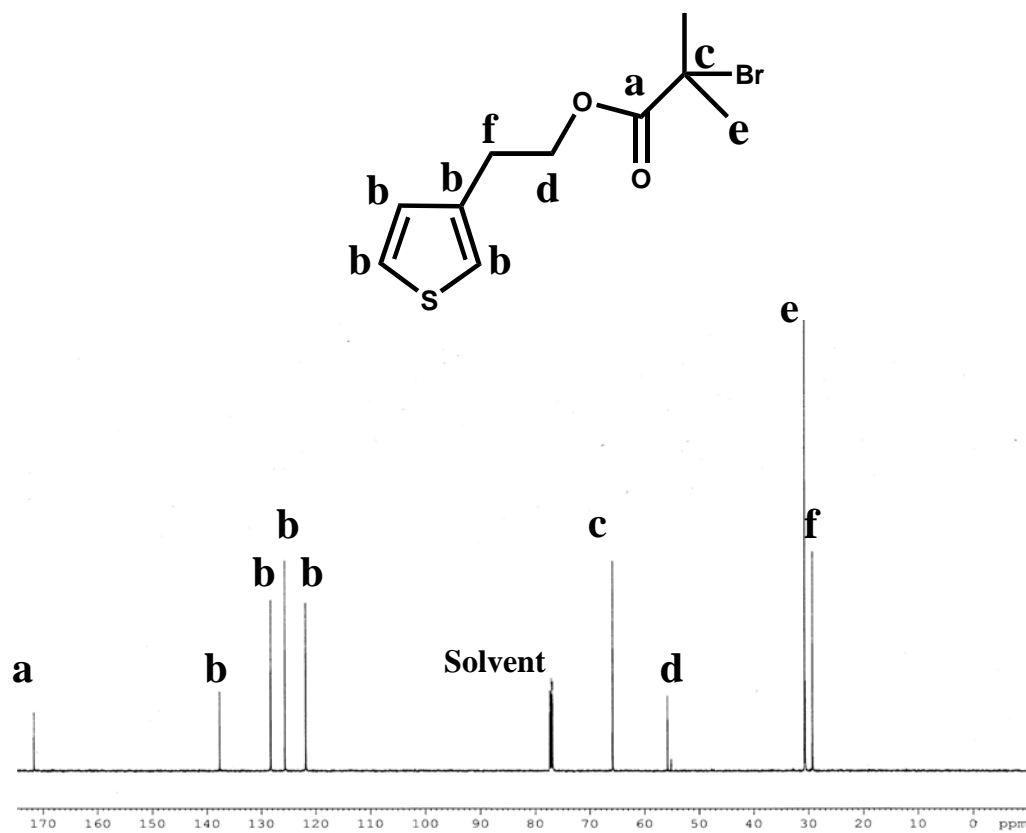

**SI Fig. 3a** <sup>13</sup>C NMR spectra of TI in CDCl<sub>3</sub> along with their peak assignments.

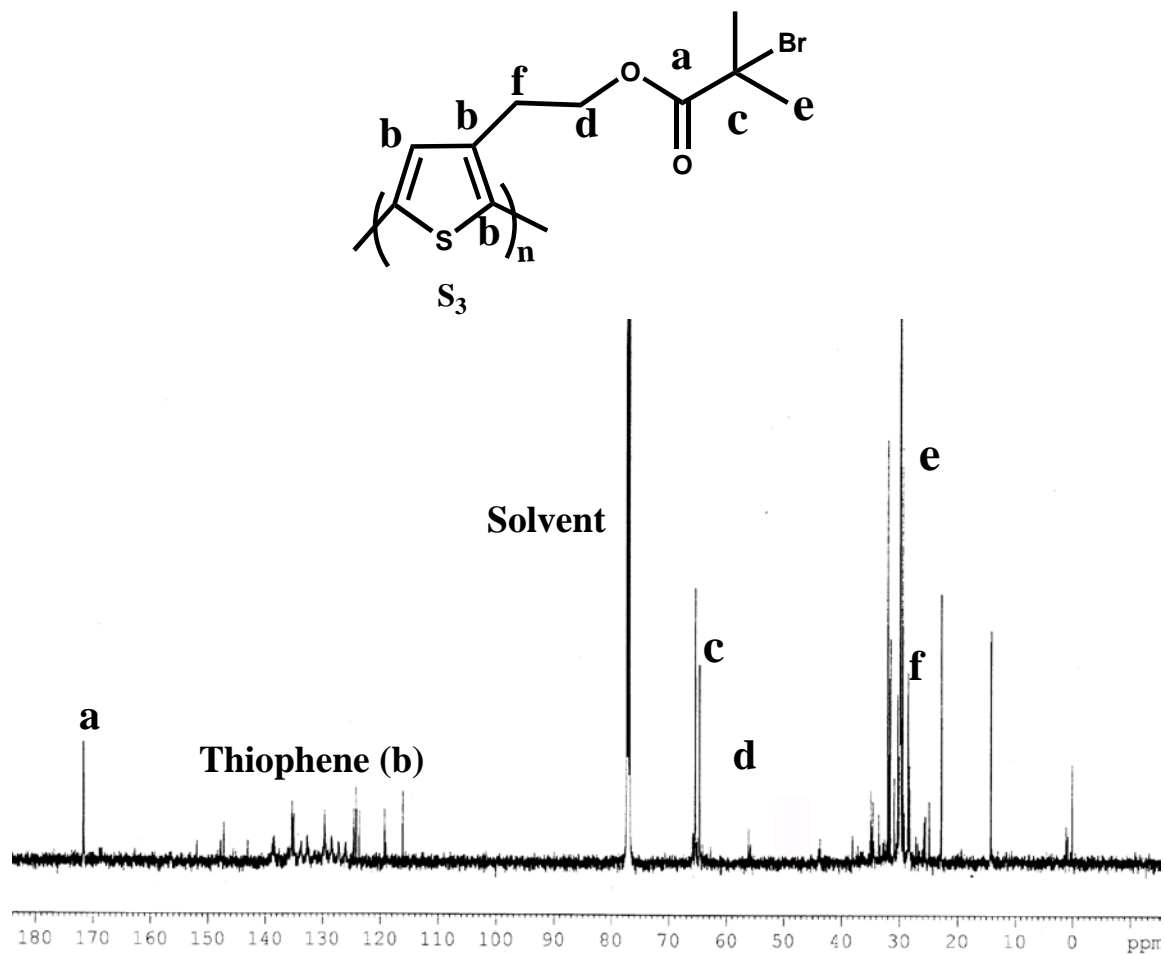

**SI Fig. 3b** <sup>13</sup>C NMR spectra of PTI in CDCl<sub>3</sub> along with their peak assignments.

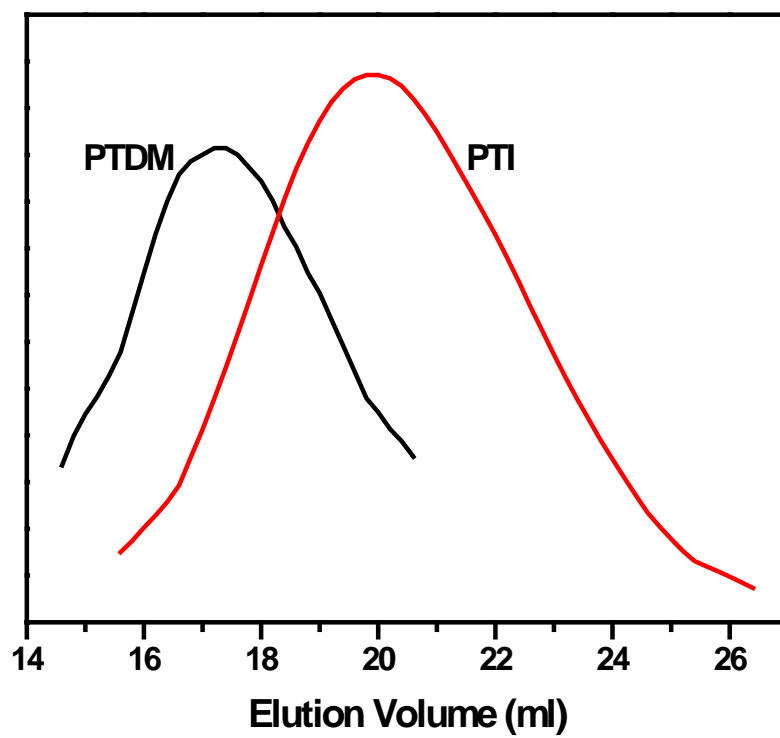

SI Fig. 4 GPC traces of PTI and PTDM polymer

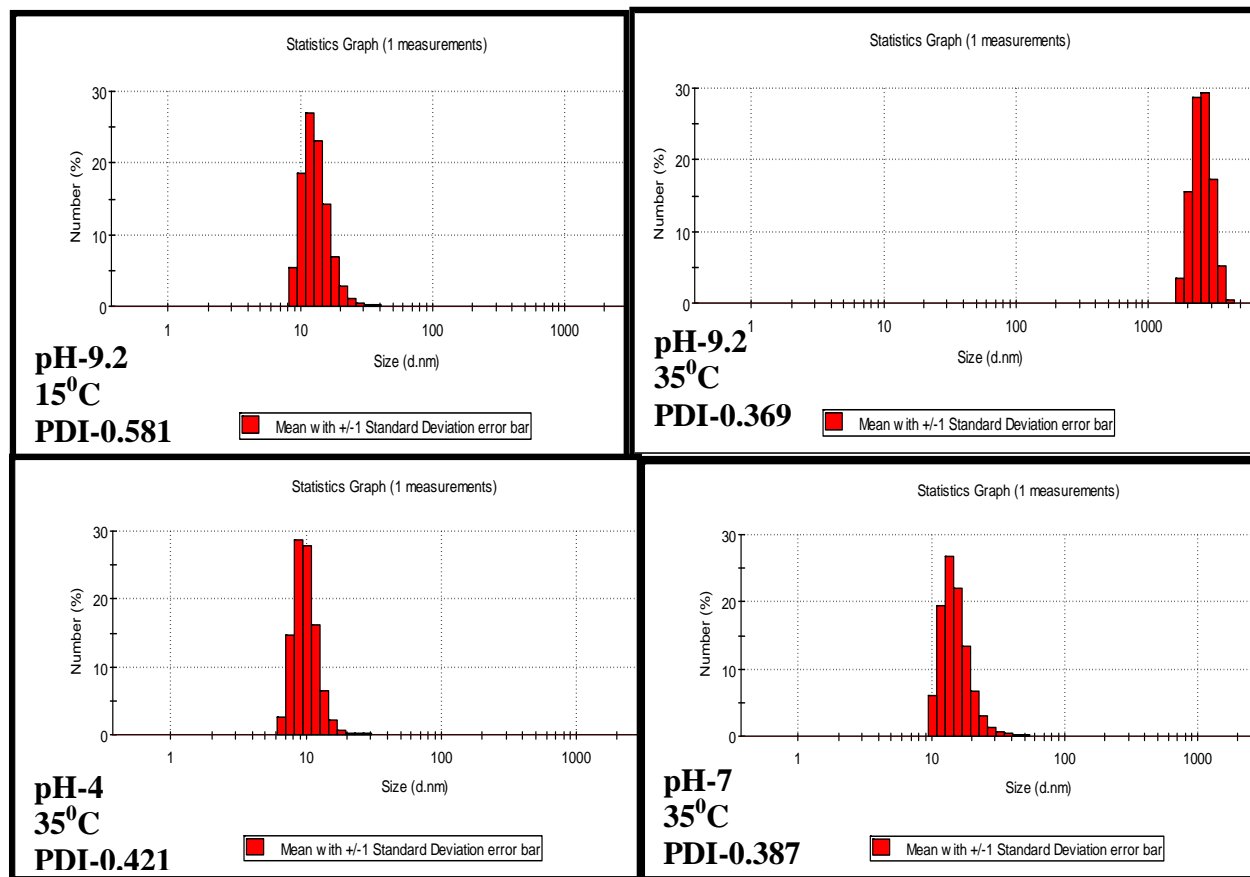

**SI Fig. 5** Histogram of particle size distribution at different pH and temperature, the PDI values at each diagram indicates polymolecularity of the samples.

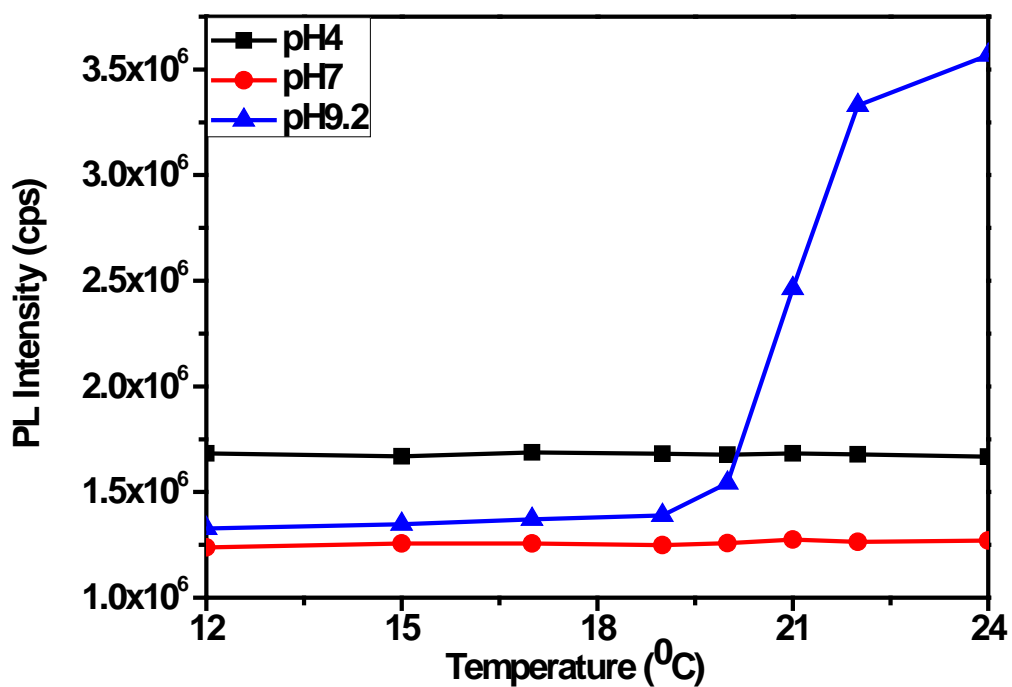

SI Fig. 6(a). PL Intensity vs. temperature plot of PTDM1 solution (0.3 % w/v) with increasing temperature at different pH.

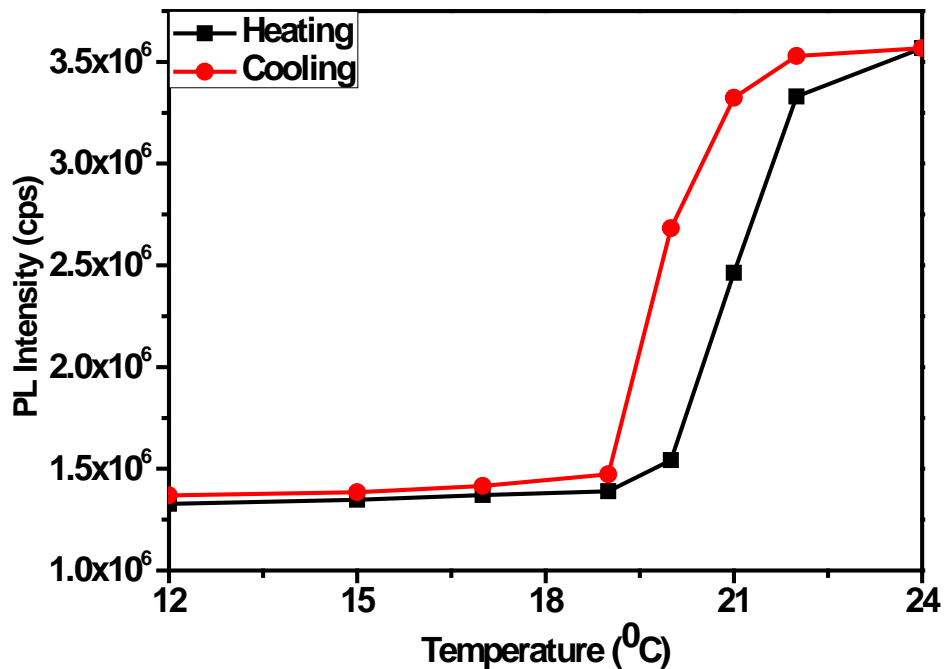

SI Fig. 6(b). PL Intensity vs. temperature plot of PTDM1 solution (0.3 % w/v) of with increasing temperature at pH-9.2



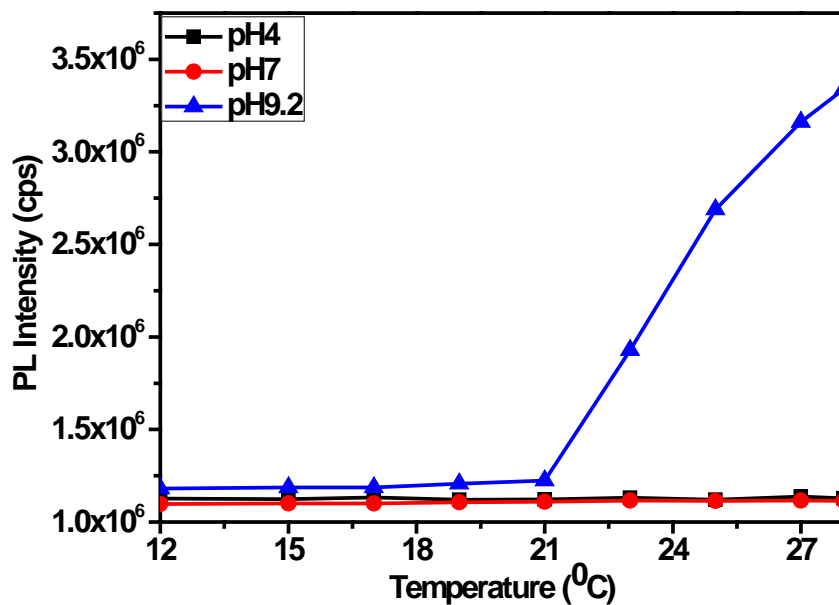

Fig. 6(c). PL Intensity vs. temperature plot of PTDM2 solution (0.3 % w/v) with increasing temperature at different pH.

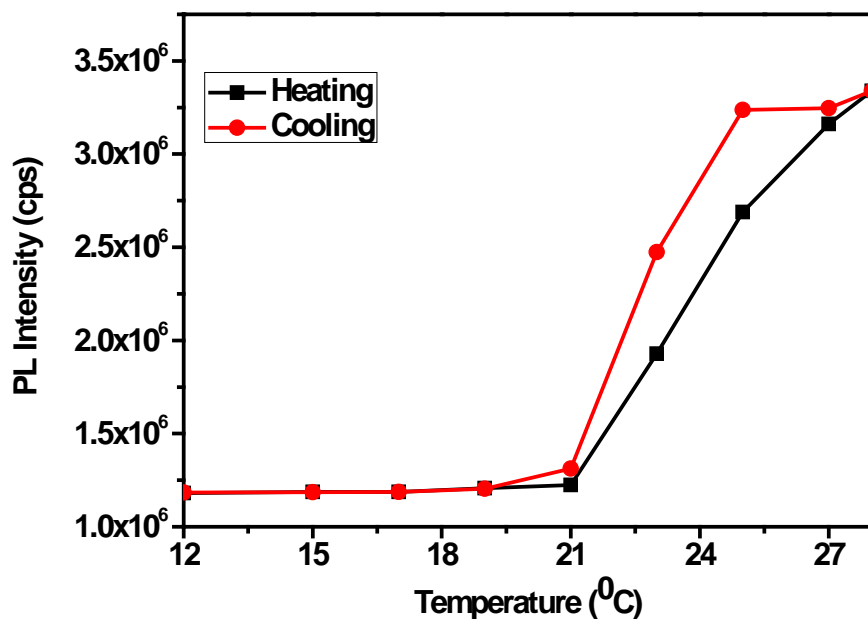

Fig. 6(d). PL Intensity vs. temperature plot of PTDM2 solution (0.3 % w/v) with increasing temperature at pH-9.2.

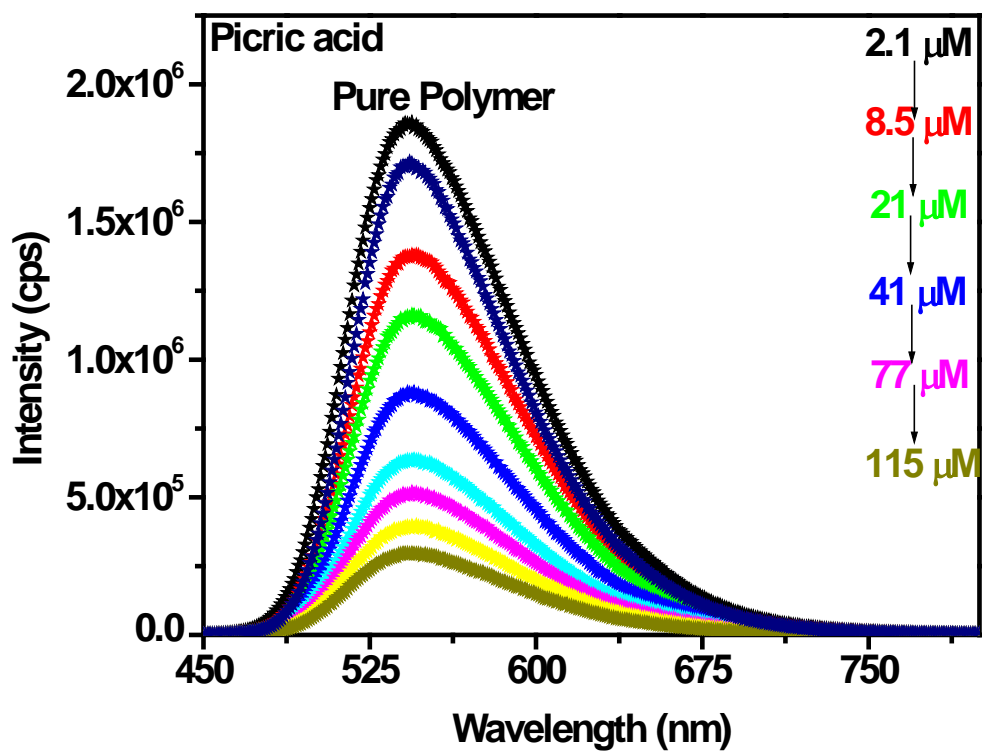

SI Fig. 7(a) Normalized PL spectra of PTDM solution (0.2 % w/v) with increasing picric acid concentration

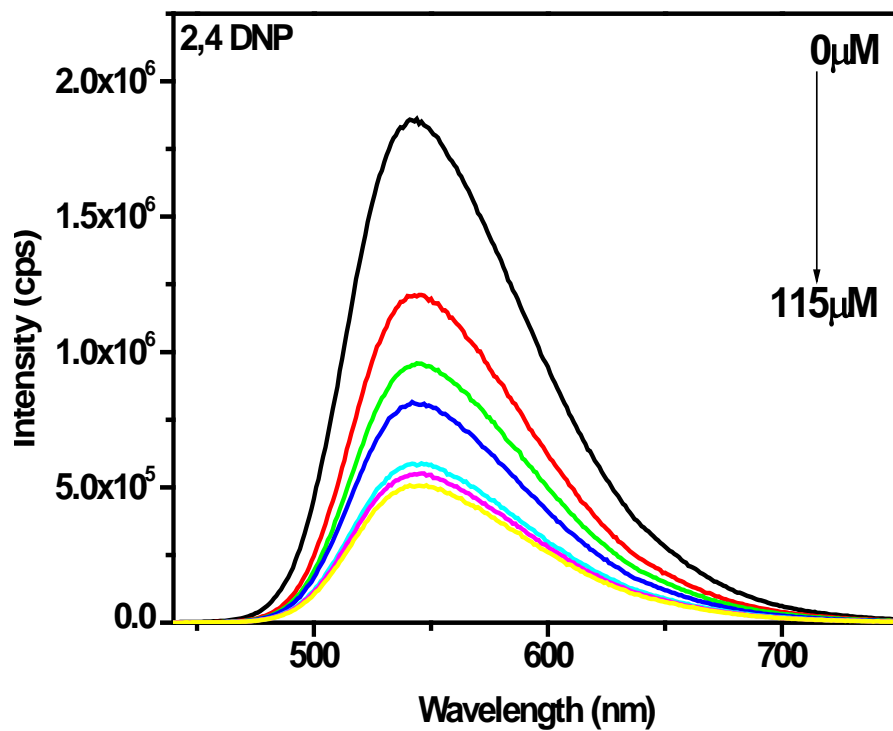

**SI Fig.7(b)** Normalized PL spectra of PTDM solution (0.2 % w/v) with increasing 2,4 DNP concentration

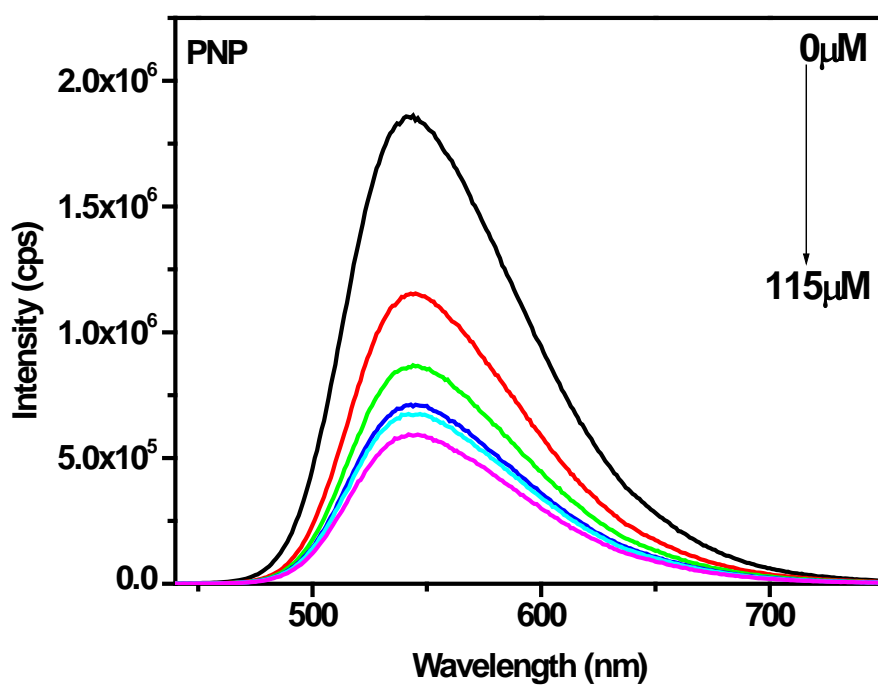

**SI Fig. 7(c)** Normalized PL spectra of PTDM solution (0.2% w/v) with increasing PNP concentration
